# Supplementary material for: Immunometabolite L-2-HG promotes epigenetic modification of exhausted T cells and improves antitumor immunity
Source: JCI journal article supplement (doi:10.1172/jci.insight.174600), 2025-03-04
Supplement: sd1 [file 1]

## Supplemental Figure. 1

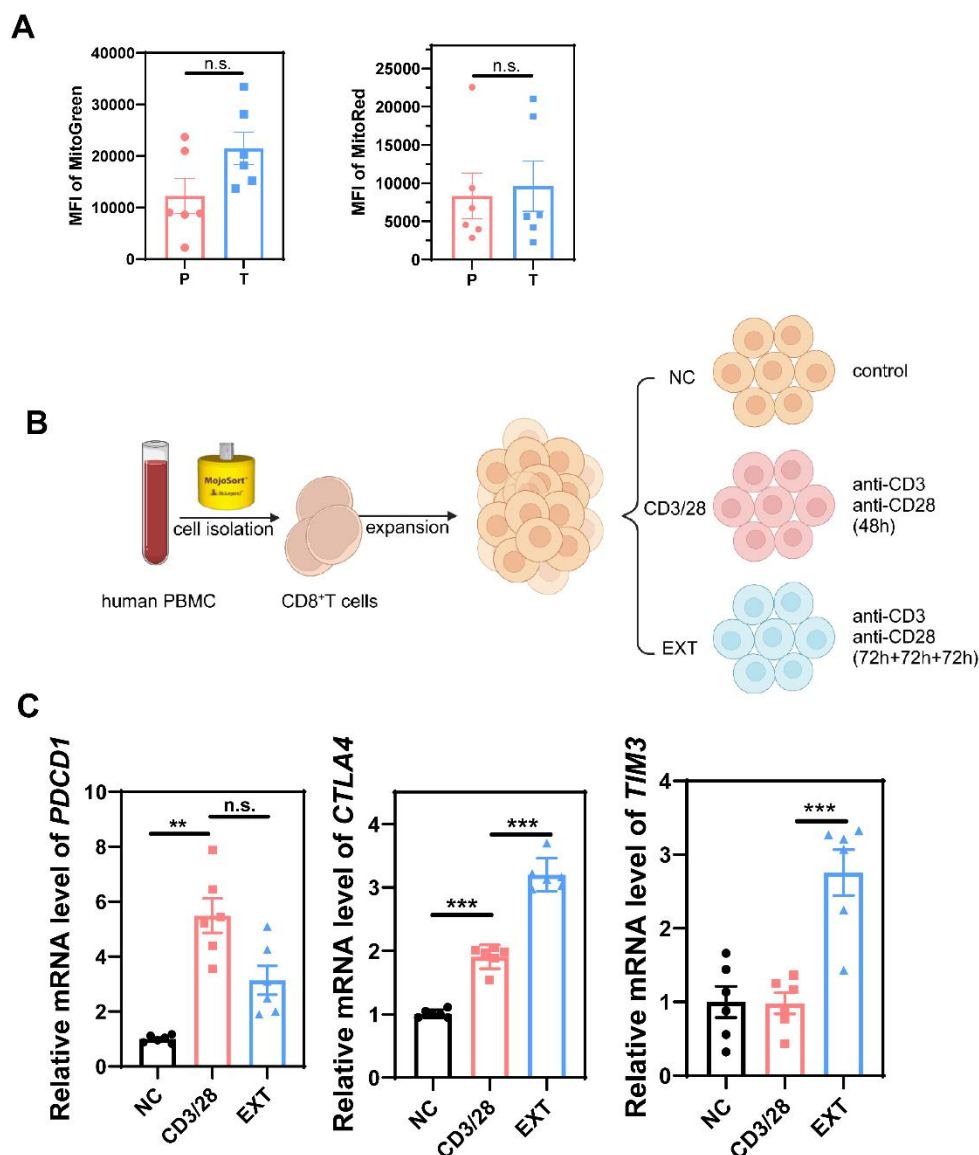

### Supplemental Figure 1. Exhaustion model construction and evaluation

A. Bar graph showing MFI of MitoGreen and MitoRed in T cells of tumor tissue and paracancerous tissue of HCC patients.

B. Scheme of the in vitro exhaustion model construction.

C. The mRNA expression levels of *PDCD1*, *CTLA4*, *TIM3* genes in NC, CD3/28 activation, and exhaustion.

n=6 for per group and each dot represents a sample(A,C). Data are represented as mean  $\pm$  SEM. \*  $P < 0.05$ , \*\*  $P < 0.01$ , \*\*\*  $P < 0.001$  by 1-way ANOVA (C) or 2-tailed Student's t test (A). *PDCD1*, Programmed cell death protein 1; *CTLA4*, Cytotoxic T-Lymphocyte Associated Protein 4; *TIM3*, hepatitis A virus cellular receptor 2.

## Supplemental Figure. 2

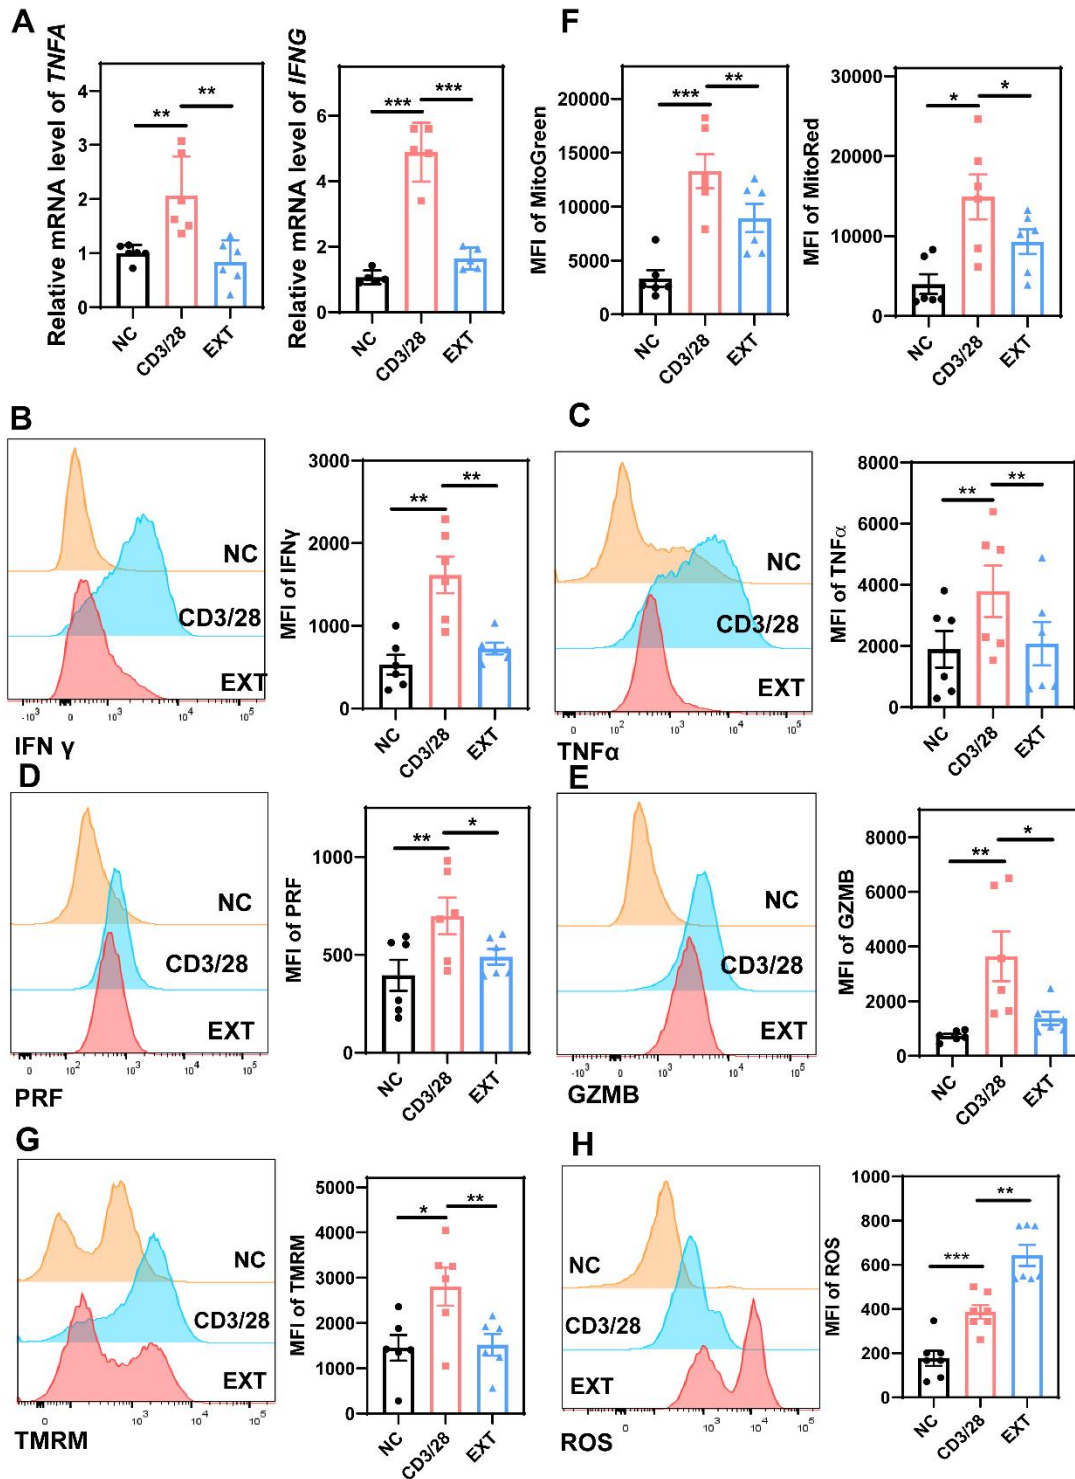

### Supplemental Figure 2. Exhaustion model phenotype

A. The mRNA expression levels of *TNFA*, *IFNG* in NC, CD3/28 activation, and exhaustion group.

B-E. The protein level of IFN $\gamma$ , TNF $\alpha$ , PRF1, and GZMB in NC, CD3/28 activation, and exhaustion group.

F. Histogram showing MFI stained with MitoGreen and MitoRed in cells of NC, CD3/28 activation, and exhaustion group. G and H. The representative flow chart of TMEM (left) and ROS (right) levels of T cells in the NC group, CD3/28 activation group, and exhaustion group. n=4-7 for per group and each dot represents a sample(A-G). Data are represented as mean  $\pm$  SEM. \*  $P < 0.05$ , \*\*  $P < 0.01$ , \*\*\*  $P < 0.001$  by 1-way ANOVA (A-G). IFN $\gamma$ , interferon gamma; TNF $\alpha$ , tumor necrosis factor alpha-like; PRF1, perforin 1; GZMB, granzyme B; TMRM, tetramethylrhodamine, methyl ester; ROS, Reactive oxygen species.

### Supplemental Figure. 3

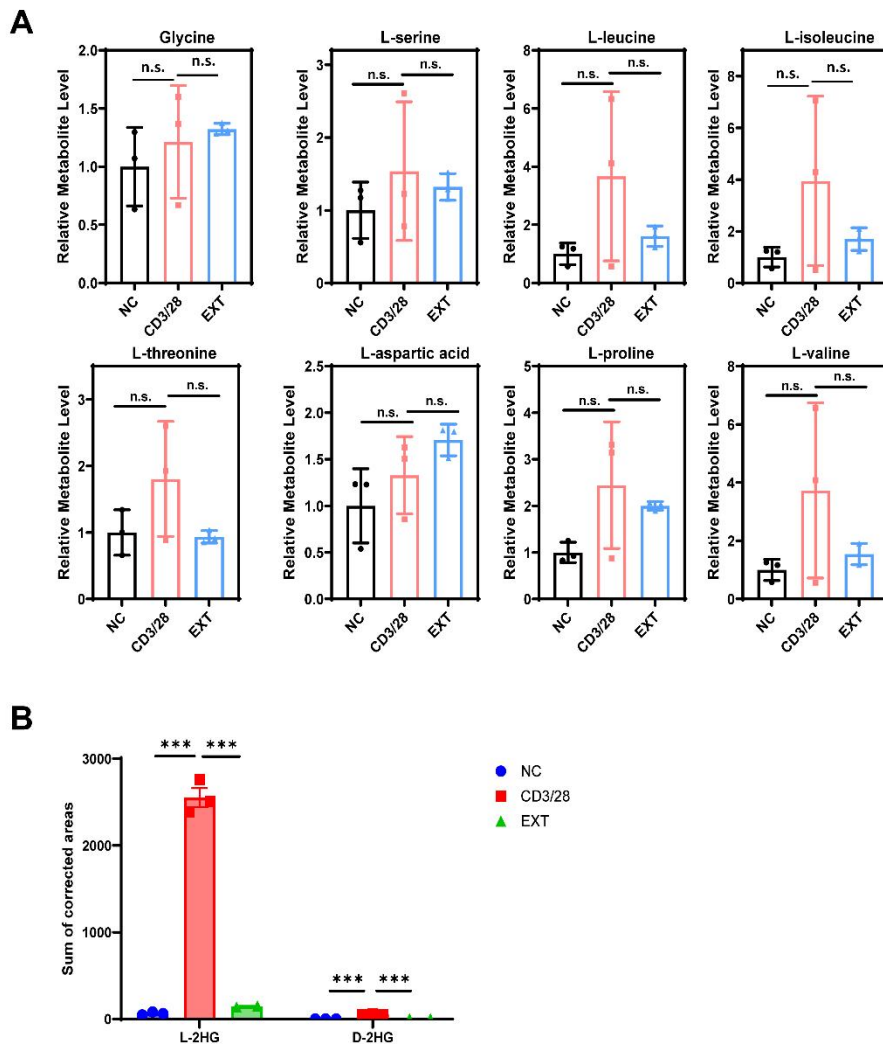

### Supplemental Figure 3. Exhausted T cell metabolic imbalance

A. Detection of amino acid in NC, CD3/28 activation, and exhaustion group by GC-MS. N=3 per group. Detection of the relative content of 2-HG levels by GC-MS through the area under the curve in NC, CD3/28 activation, and exhaustion group. Data are represented as mean  $\pm$  SEM. \*  $P < 0.05$ , \*\*  $P < 0.01$ , \*\*\*  $P < 0.001$  by one-way ANOVA.

A

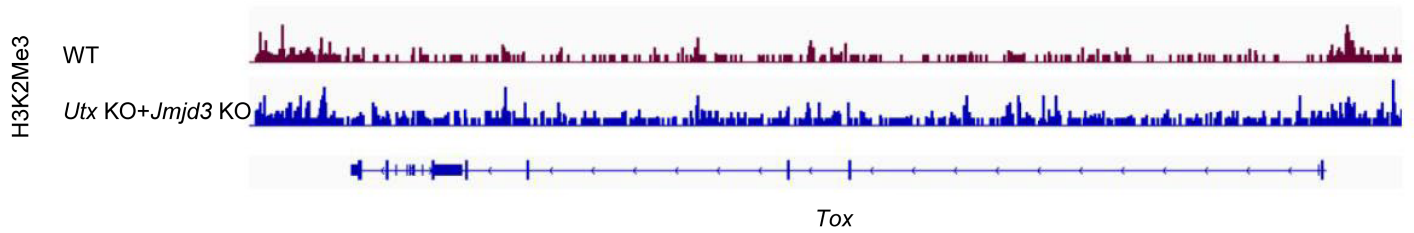

B

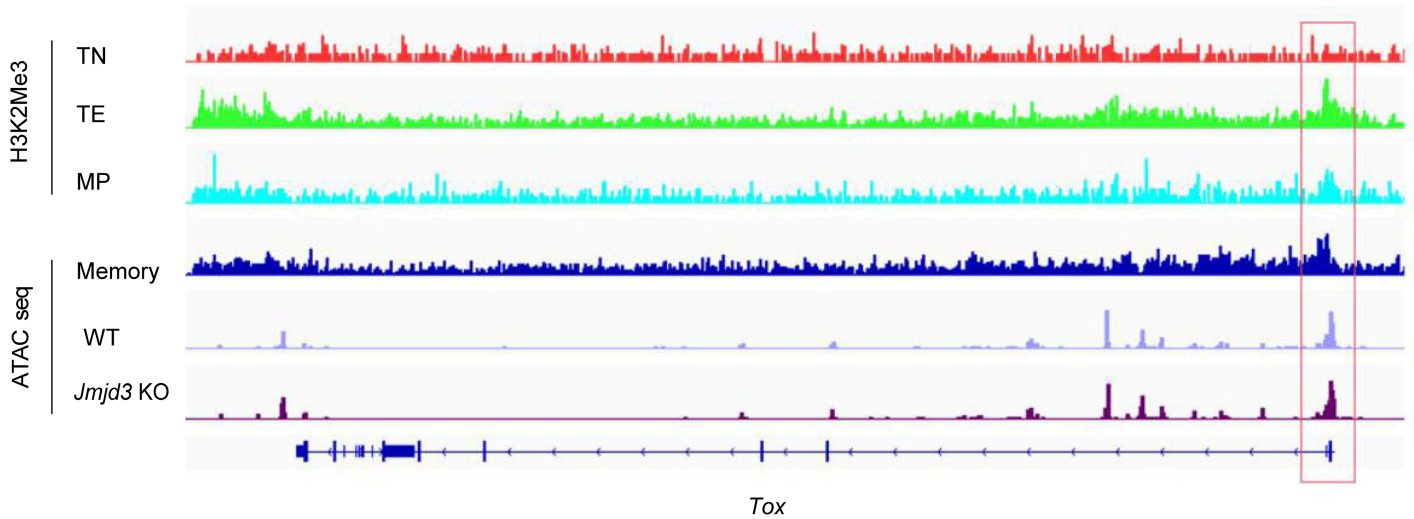

C

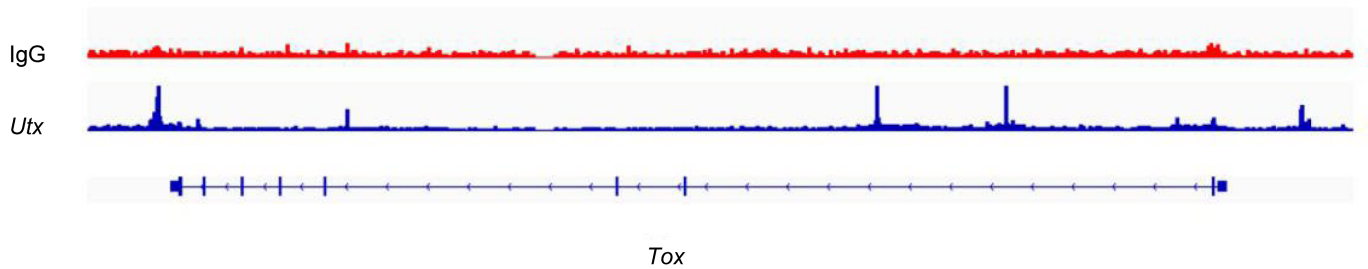

A. ChIP-seq analysis reveals an increase in H3K27Me3 modification at the *Tox* locus following *Utx* and *Jmjd3* knockout in OT-II Kdm6b<sup>f/f</sup>, Kdm6a<sup>f/f</sup> Cd4-Cre mature CD4 SP thymocytes.

B. Differential H3K27Me3 modification levels at the *Tox* locus across various CD8<sup>+</sup> T cell subsets, including naive, KLRG1<sup>hi</sup>IL7R<sup>lo</sup> terminal effector, KLRG1<sup>lo</sup>IL7R<sup>hi</sup> memory precursor, and KLRG1<sup>lo</sup>IL7R<sup>hi</sup> memory CD8<sup>+</sup> T cells, are shown. ATAC-seq analysis of chromatin accessibility in WT and *Jmjd3* knockout CD8<sup>+</sup> T cells (P14 TCR transgenic) is also presented.

C. ChIP-seq analysis demonstrates UTX binding at the *TOX* locus in the T-ALL cell line Jurkat.

The datasets were obtained from the GEO database (accession numbers GSE70795, GSE89036, GSE161842, and GSE64832 respectively)

## Supplemental Figure.5

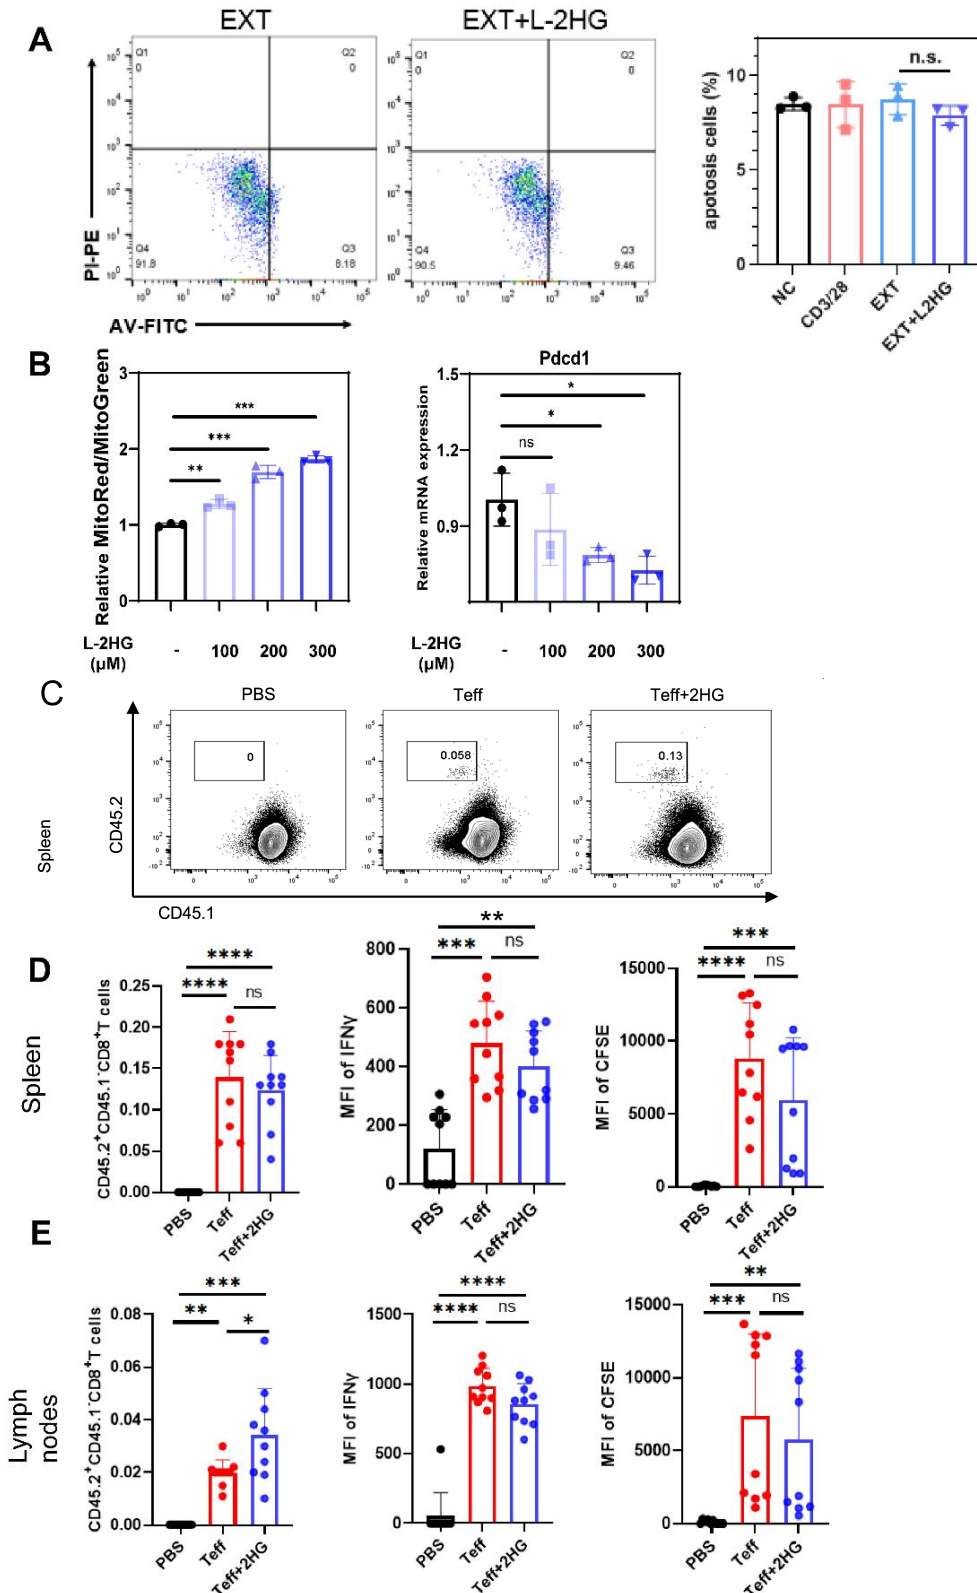

**Supplemental Figure 5. The effects of L-2HG treatment on exhausted T cells phenotypes and anti-tumor immunity**

A. Apoptosis assessment by Annexin V/ Propidine Iodide (PI) staining of exhausted model T cells treated with +/- L-2HG (n=3 for each group). The methods have been reported in Figure 5.

B. We tested the effects of L-2HG with different doses on cell mitochondrial function and *PDCD1* expression (n=3 for each group).

C-E. At 28 hours post transfer, the number of transferred cells (CD45.2<sup>+</sup>CD45.1<sup>-</sup> T cells), the expression of IFN- $\gamma$  and CFSE staining in the spleens(C-D) or lymph nodes(E) of recipient mice were assessed using flow cytometry. The detailed methods have been illustrated in Figure 6. n=10 for each group(D-E).

Data are represented as mean  $\pm$  SEM. \* P < 0.05, \*\* P < 0.01, \*\*\* P < 0.001 by 1-way ANOVA. PBS, PBS negative control; Teff, effector T cells; Teff+L-2HG, effector T cells treated with 300 $\mu$ M L-2HG.

**Supplemental Table 1.** The primer sequences of genes tested in the study.

**Supplemental Table 2.** The list of 871 genes with significant expression changes tested by RNA sequencing analysis ( $p < 0.05$ ) in PD1<sup>+</sup> CD8<sup>+</sup> T cells compared to PD1<sup>-</sup> CD8<sup>+</sup> T cells.

**Supplemental Table 3 and 4.** ATAC sequencing analysis identified significant alterations in chromatin accessibility in PD1<sup>+</sup> CD8<sup>+</sup> T cells compared to PD1<sup>-</sup> CD8<sup>+</sup> T cells, with hundreds of genes showing changes ( $p < 0.05$ ); Supplemental Table 3 for up-regulated peaks and Supplemental Table 4 for down-regulated peaks.
